# Supplementary material for: Detection of prostate specific antigen (PSA) in human saliva using an ultra-sensitive nanocomposite of graphene nanoplatelets with diblock-co-polymers and Au electrodes
Source: Royal Society of Chemistry journal article supplement (doi:10.1039/c7an01932g), 2018-01-01
Supplement: c7an01932g1.pdf [file c7an01932g1.pdf]

*Electronic Supporting Information*

## **Detection of Prostate Specific Antigen (PSA) in Human Saliva Using an Ultra-Sensitive Nanocomposite of Graphene Nanoplatelet with Diblock-co-Polymer and Au Electrodes**

Muhammad Shuja Khan<sup>1,2,†</sup>, Ketan Dighe<sup>1,2,†</sup>, Zhen Wang<sup>1,2</sup>, Indrajit Srivastava<sup>1,2</sup>, Enrique Daza<sup>1,2</sup>, Aaron S. Schwartz-Duval<sup>1,2</sup>, Jamil Ghannam<sup>1,2</sup>, Santosh Kumar Misra<sup>1,2</sup>, Dipanjan Pan<sup>1,2,3,4\*</sup>

<sup>1</sup>Department of Bioengineering, University of Illinois at Urbana-Champaign, Urbana, IL USA

<sup>2</sup>Biomedical Research Center, Carle Foundation Hospital, Urbana, IL USA

<sup>3</sup>Beckman Institute for Advanced Science & Technology, University of Illinois at Urbana-Champaign, IL USA

<sup>4</sup>Department of Materials Science and Engineering, University of Illinois-Urbana Champaign, Illinois, IL USA

\*Email: [dipanjan@illinois.edu](mailto:dipanjan@illinois.edu)

† MSK and KD have contributed equally.

### **Table of Contents:**

**Table S1.** Comparison of previously developed biosensors to detect PSA in serum/whole blood/PSA aqueous solution.

**Figure S1.** SEM images of the developed paper-based electrical biosensor chip

**Figure S2.** XPS narrow scan regions for C1s and O1s from Fig. 3 to reveal bonding chemistry of GRP-Polymer.

**Figure S3.** Reproducibility of biosensor chips with bare electrodes

**Figure S4.** High resolution SEM images of nanocomposite of GRP/PS<sub>67</sub>-*b*-PAA<sub>27</sub> coated on filter paper.

**Table S1.** Performance of the previously reported POC biosensor chips to evaluate PSA in serum/whole blood/PSA aqueous solution.

| Biosensor method and materials                                              | Technique              | Sample/Vol./Time   | RoD              | LoD       | Ref (year) |
|-----------------------------------------------------------------------------|------------------------|--------------------|------------------|-----------|------------|
| Si/IDμE/DTSP/Anti-PSA/EA                                                    | EIS                    | Plasma/NA/45min    | 0.1-100pg/mL     | 1pg/mL    | 23 (2011)  |
| AuNPs-Anti-PSA/tPSA/PSA capture antibody                                    | SPR                    | Serum/NA/3min      | 0.29-150ng/mL    | 0.29ng/mL | 24 (2012)  |
| GS-MB-CS                                                                    | CV                     | Serum/NA/NA        | 0.05-5mg/mL      | 13pg/mL   | 25 (2012)  |
| Paper-SPE/GS/HRP-Ab <sub>2</sub> /AuNPs                                     | CV, EIS                | Serum/10μL/40min   | 2pg/mL-1000ng/mL | 2pg/mL    | 26 (2012)  |
| Ab/AgMSNs/GCE/AuNPs                                                         | CV                     | Serum/5μL/1hr      | 0.05-50ng/mL     | 15pg/mL   | 27 (2013)  |
| GCE/IL/MWCNTs/Chit/GC/AuNPs-PAMAM                                           | DPV, EIS, CV           | Serum/10μL/20min   | 0.2-40ng/mL      | 20pg/mL   | 28 (2013)  |
| DNA/Anti-PSA/DTSP/AuNPs                                                     | CV, Amperometric       | Serum/NA/1hr       | 1pg/mL-10ng/mL   | 1pg/mL    | 29 (2014)  |
| MHA/EG <sub>3</sub> SH/AminePEG <sub>3</sub> biotin/Avidin/GME              | EIS                    | Serum/NA/NA        | 5-100ng/mL       | 0.6ng/mL  | 30 (2014)  |
| Microfluidic ELISA- Fluoropolymer MCF                                       | Calorimetric           | Blood/100μL/15min  | 0.9-60ng/mL      | 0.08ng/mL | 31 (2014)  |
| MWCNTs/IL/Chit/AuNPs-PAMAM                                                  | DPV, EIS               | Serum/10μL/20min   | 2pg/mL-80ng/mL   | 1pg/mL    | 32 (2014)  |
| Fluoropolymer MCF sandwich assay                                            | Fluorescent assay      | Blood/100μL/13min  | 80pg/mL-60ng/mL  | 0.08ng/mL | 33 (2015)  |
| PSA-MIP-Capacitive Sensor                                                   | Electrical capacitance | Serum /250μL/15min | 80fg/mL-100ng/mL | 80fg/mL   | 34 (2015)  |
| AgNH <sub>2</sub> -MCM48/ NH <sub>2</sub> -GSFCA/GCE                        | EIS                    | Serum/NA/2hr       | 0.01-10ng/mL     | 2pg/mL    | 35 (2015)  |
| Silica-NPs/POEGMA-co-GMA/Au-NS                                              | DPV, EIS, CV           | PSA/NA/2hr         | 5pg/mL-1000ng/mL | 2.3pg/mL  | 36 (2015)  |
| Aptamer based MoS <sub>2</sub> nano-sheets                                  | Fluorescent assay      | Serum/100μL/40min  | 0.5-300ng/mL     | 0.2ng/mL  | 37 (2015)  |
| GQDs@Ag-Ab <sub>2</sub> /H <sub>2</sub> O <sub>2</sub>                      | Fluorescent assay      | Serum/50μL/150min  | 0.001-20ng/mL    | 0.3pg/mL  | 38 (2015)  |
| Graphene quantum dots ( Au/Ag-rGO)                                          | ECL                    | Serum/NA/30min     | 1-10ng/mL        | 29pg/mL   | 39 (2016)  |
| PSA-MIP-SPR Sensor                                                          | SPR                    | Serum/150μL/50min  | 100pg/mL-10ng/mL | 91pg/mL   | 40 (2016)  |
| Ag-coated SiNPs/Anti-PSA                                                    | SERS                   | Serum/15μL/3hr     | 0.001-1000ng/mL  | 0.11pg/mL | 41 (2016)  |
| (TMDC)MoS <sub>2</sub> /EHDA/IDT                                            | Electrical impedance   | Serum/100μL/40sec  | 1-800ng/mL       | 0.1ng/mL  | 42 (2017)  |
| PSA-AuNPs-Dpa-melanin CNSs                                                  | CV, EIS                | Serum/10μL/50min   | 0.01-100ng/mL    | 2.7 pg/mL | 43 (2017)  |
| rGO-MWCNT/AuNPs nanocomposite                                               | DPV, EIS               | Serum/NA/40min     | 5pg/mL-100ng/mL  | 1pg/mL    | 44 (2017)  |
| ITO glass/SnS <sub>2</sub> @mpg-C <sub>3</sub> N <sub>4</sub> nanocomposite | PEC                    | Serum/6μL/1hr      | 50fg/mL-10ng/mL  | 21fg/mL   | 45 (2017)  |
| Ag@SiO <sub>2</sub> @SiO <sub>2</sub> -RuBpy core-shell NPs                 | Fluorescent assay      | Serum/30μL/1hr     | 0.1-100ng/mL     | 27pg/mL   | 46 (2017)  |
| WO <sub>3</sub> -Au/ITO/Ab <sub>1</sub> /PSA/rGO-Ca: CdSe-Ab <sub>2</sub>   | PEC                    | Serum/NA/NA        | 5pg/mL-50ng/mL   | 2.6pg/mL  | 47 (2017)  |
| Paper/GRP/PS- <i>b</i> -PAA/Au/DTSP/EA                                      | Electrical impedance   | Saliva/10μL/3-5min | 40fg/mL-100ng/mL | 40fg/mL   | This work  |

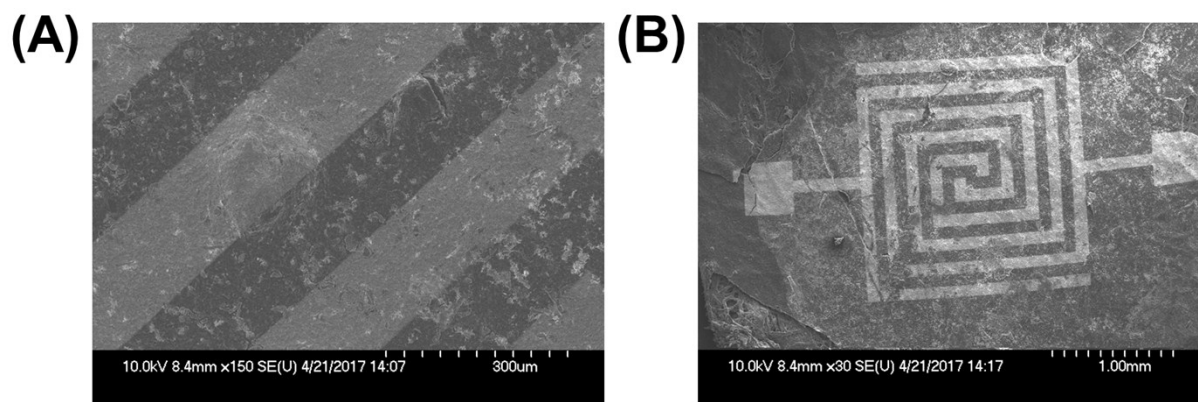

**Figure S1.** SEM images of the developed paper-based electrical biosensor chip. (A) Au electrodes immobilized with anti-PSA antibody. (B) Sensor chip tested with human saliva sample.

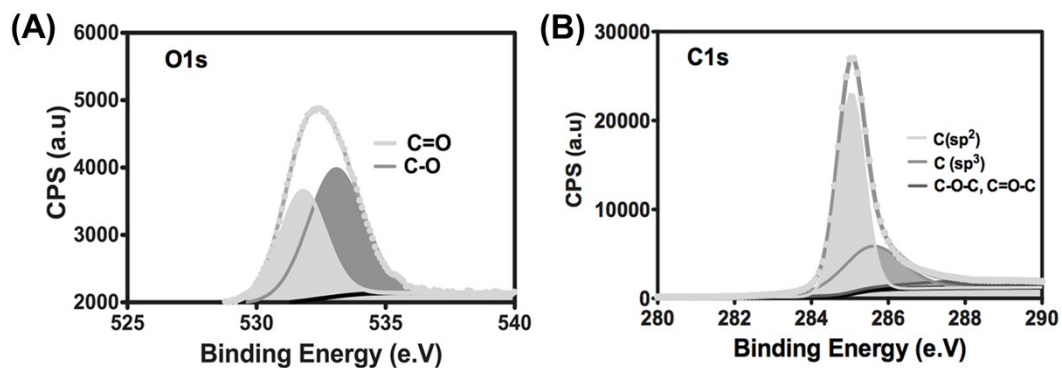

**Figure S2.** XPS narrow scan regions for C1s and O1s from Figure 3 was de-convoluted showing different bond types present in GRP-polymer.

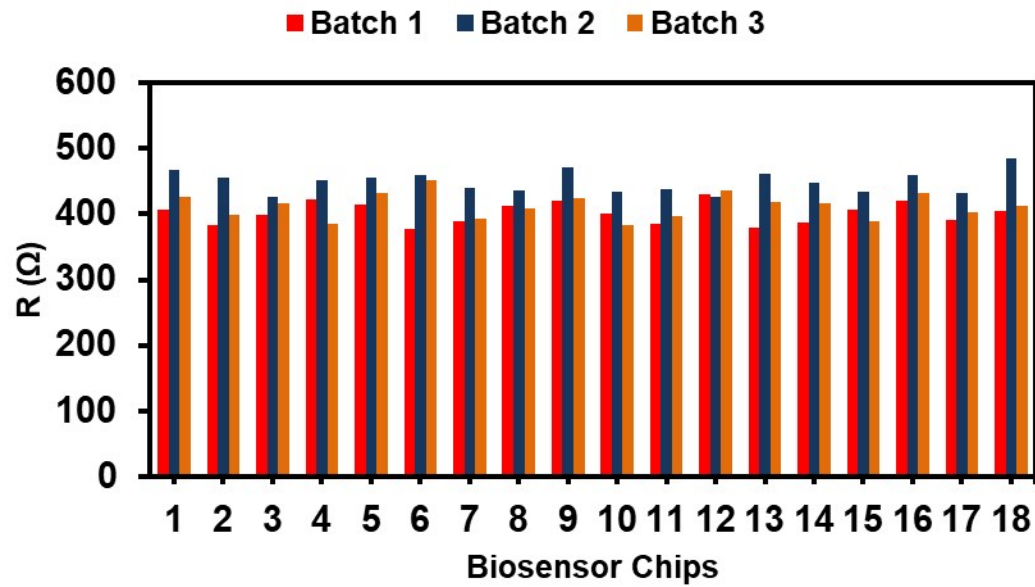

Figure S3. Reproducibility of biosensor chips before immobilizing anti-PSA antibody and testing human saliva sample. For each batch, among 24 sensor chips, 18 sensor chips have shown electrical resistance of  $416.52 \Omega$  with SD of  $\pm 17.82$ .

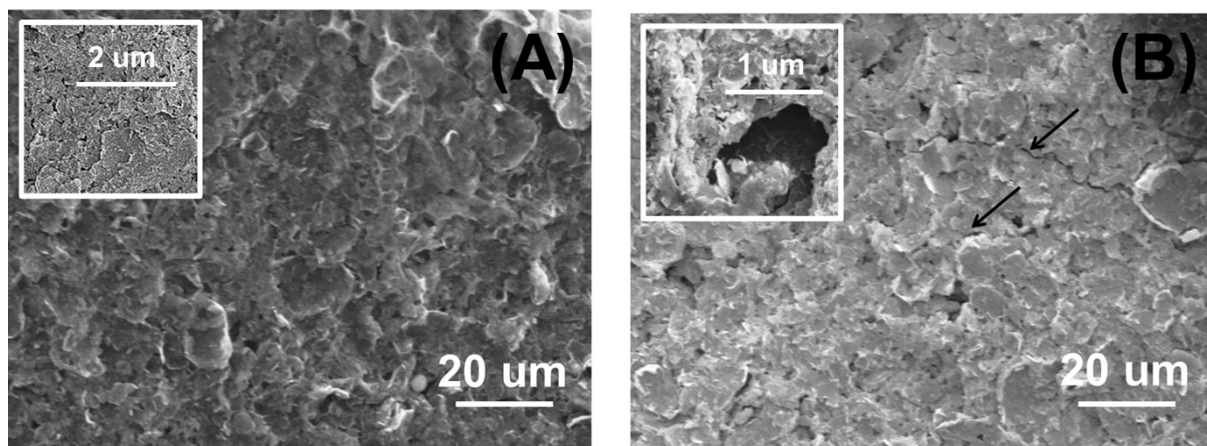

Figure S4. High resolution SEM images of nanocomposite of GRP/PS<sub>67</sub>-*b*-PAA<sub>27</sub> coated on filter paper. (A) Week 1. (B) Week 9. Inset reveals high resolution SEM images to study the quality of the nanocomposite. Arrows in (B) clearly reflect the defects at week 9.
